# Supplementary material
Source: Springer Nature journal article supplement (https://www.springermedizin.de/resource/supplementary/13014_2012_803_MOESM7_ESM.pdf/9634764)

**A***M059J*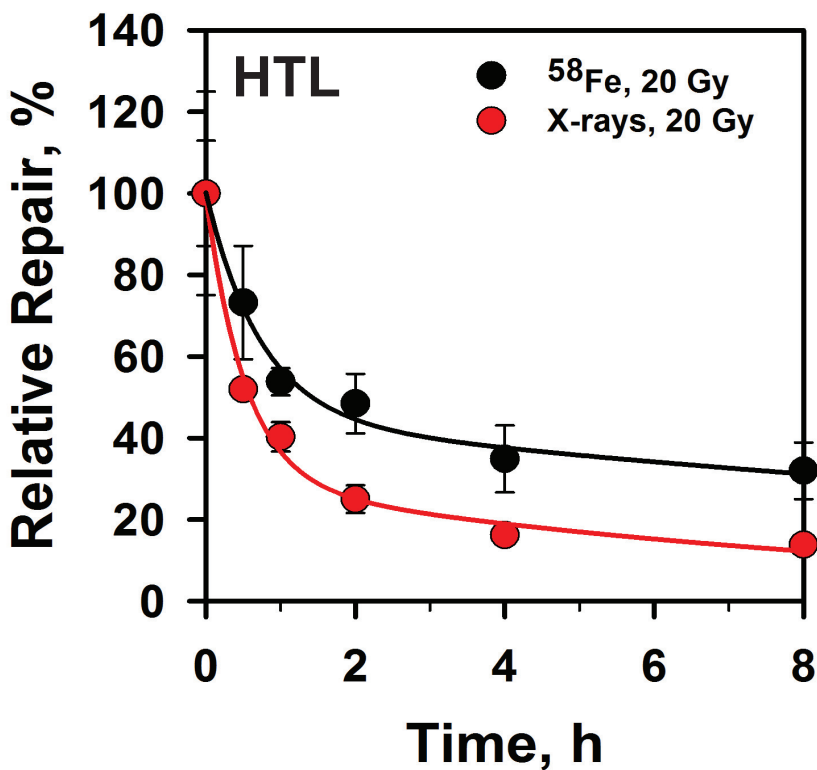**B**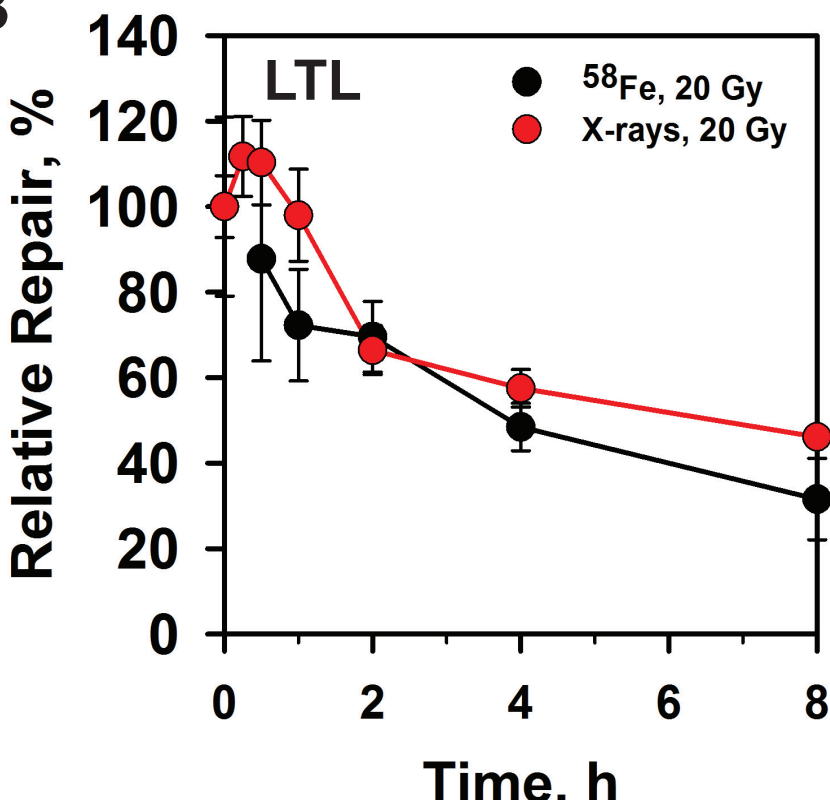

Supplement: MOESM7 [file 9634764]
